# Supplementary material for: When Females Produce Sperm: Genetics of C. elegans Hermaphrodite Reproductive Choice
Source: PubMed Central journal article supplement (PMC3789810; doi:10.1534/g3.113.007914), 2013-10-01
Supplement: supp_g3.113.007914_FigureS2.pdf [file supp_g3.113.007914_FigureS2.pdf]

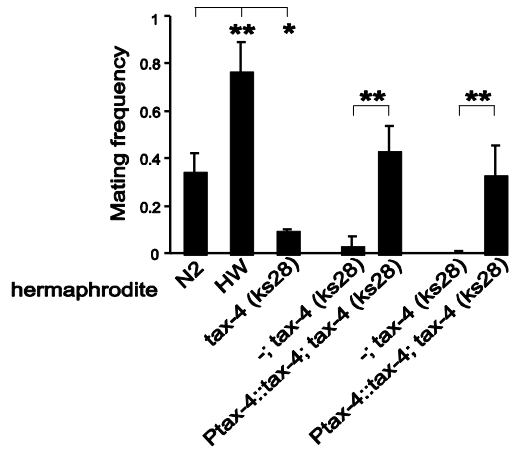

**Figure S2. Transgenic rescue of the *tax-4 (ks28)* mutant recapitulates wild-type N2 hermaphrodite mating frequency**

Mating frequency of two transgenic strains, ZC2302 and ZC2303 [and their nontransgenic siblings, depicted by a 'minus' sign], expressing a full-length N2 *tax-4* genomic DNA fragment in a *tax-4 (ks28)* background. Bar graphs depict mean $\pm$ SEM of multiple trials. \* $p < 0.05$  and \*\* $p < 0.01$  by permutation test stratified by trial.
