# Supplementary material for: When Females Produce Sperm: Genetics of C. elegans Hermaphrodite Reproductive Choice
Source: PubMed Central journal article supplement (PMC3789810; doi:10.1534/g3.113.007914), 2013-10-01
Supplement: supp_g3.113.007914_FigureS4.pdf [file supp_g3.113.007914_FigureS4.pdf]

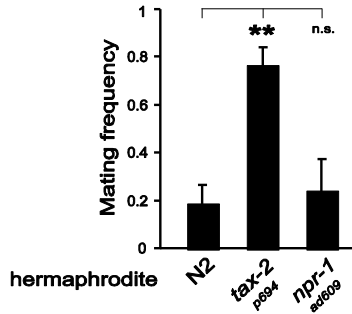

**Figure S4. The *npr-1* (*ad609*) mutant does not exhibit increased hermaphrodite mating frequency**

The *npr-1* (*ad609*) mutant, which displays bordering and aggregation behaviors, does not exhibit increased hermaphrodite mating frequency relative to N2, demonstrating that bordering and aggregation are not sufficient to cause high mating. The *tax-2* (*p694*) mutant is included here as a high mating control. Bar graphs depict mean ± SEM of multiple trials. \*\* $p < 0.01$  by permutation test stratified by trial; n.s., not-significant.
