# Supplementary material for: When Females Produce Sperm: Genetics of C. elegans Hermaphrodite Reproductive Choice
Source: PubMed Central journal article supplement (PMC3789810; doi:10.1534/g3.113.007914), 2013-10-01
Supplement: supp_g3.113.007914_FigureS6.pdf [file supp_g3.113.007914_FigureS6.pdf]

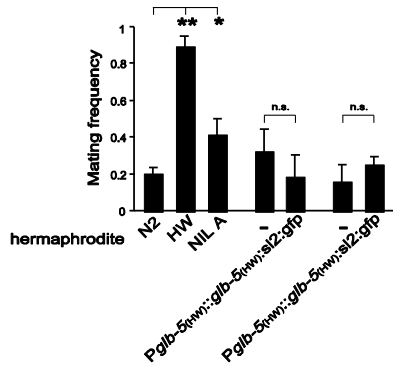

**Figure S6. Transgenic line experiments do not implicate *glb-5* as the causal gene underlying the *mate-1* QTL**

Mating frequency of two transgenic strains, ZC1902 and ZC1903 [and their nontransgenic siblings, depicted by a 'minus' sign], carrying ectopic expression of *glb-5(HW)* in an N2 background. These transgenic constructs conferred *glb-5*-dependent phenotypes in a previous study (McGrath *et al.* 2009), but had no effect on mating frequency here. Bar graphs depict mean $\pm$ SEM of multiple trials. \* $p < 0.05$  and \*\* $p < 0.01$  by permutation test stratified by trial; n.s., not significant.
